# Supplementary material for: In situ assembly of CQDs/Bi2WO6 for highly efficient photocatalytic degradation of VOCs under visible light
Source: Royal Society of Chemistry journal article supplement (doi:10.1039/c9nj04957f), 2020-01-01
Supplement: c9nj04957f1.pdf [file c9nj04957f1.pdf]

## **In Situ Assembly of CQDs/Bi<sub>2</sub>WO<sub>6</sub> for Highly Efficient Photocatalytic Degradation of VOCs under Visible Light**

Yangqing Liu,<sup>#a,b</sup> Changjun Zhu,<sup>#a,b,d</sup> Jingwen Sun,<sup>a,c</sup> Yan Ge,<sup>a,c</sup> Fujiao Song<sup>a,b</sup> and Qi Xu <sup>\*a,c</sup>

<sup>a</sup>School of Chemistry and Engineering, Yancheng Institute of Technology, Yancheng, 224000, P R China

<sup>b</sup>Key Laboratory for Advanced Technology in Environmental Protection of Jiangsu Province, Yancheng Institute of Technology, Yancheng, 224051, P R China

<sup>c</sup>Key Laboratory under Construction for Volatile Organic Compounds Controlling of Jiangsu Province, Yancheng Institute of Technology, Yancheng, 224051, P. R. China

<sup>d</sup>Academy of Environmental Planning & Design, Co., Ltd., Nanjing University, Nanjing, 210093, P R China

<sup>#</sup>These authors contributed equally to this work

Corresponding author: Qi Xu (xqsteve@ycit.cn)

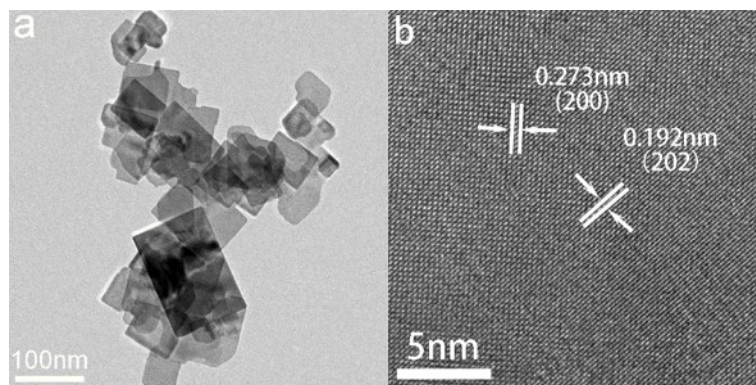

**Fig S1.** TEM images of  $\text{Bi}_2\text{WO}_6$  (a, b).

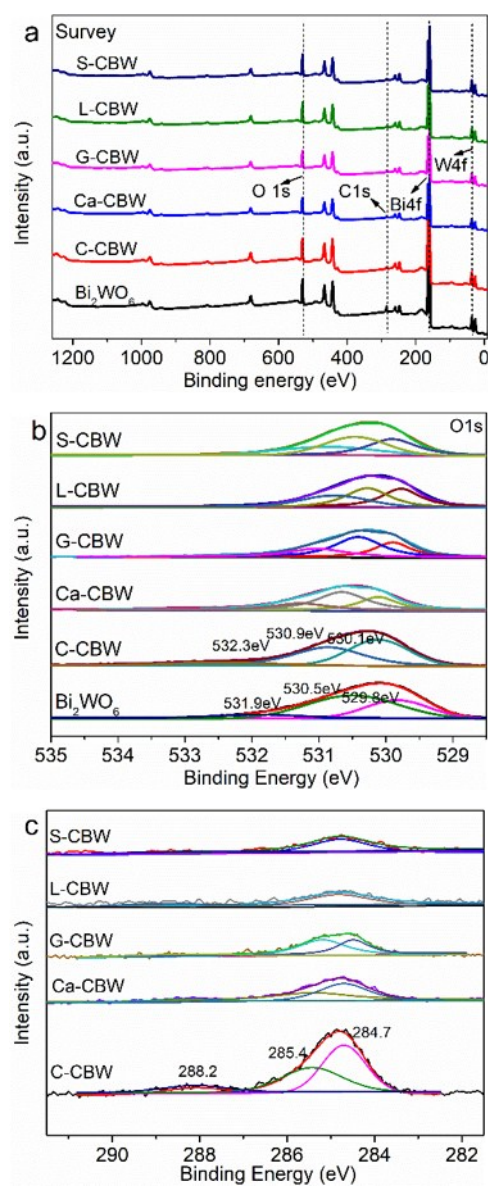

**Fig S2.** XPS survey spectra of  $\text{Bi}_2\text{WO}_6$  and CBW(a), O 1s(c) of  $\text{Bi}_2\text{WO}_6$  and CBW (b), C 1s for CBW (c).
